# Supplementary material
Source: publisher figshare collection journal article supplement (https://karger.figshare.com/ndownloader/files/8956621)
Supplement: Supplementary file 1 [file 8956621]

## Erratum

---

In the article by Masoud et al., entitled 'Inadvertent stent retriever detachment: a multicenter case series and review of device experience FDA reports' [Intervent Neurol 2015;4:75-82, DOI: 10.1159/000441920], the first name of the 11th co-author Quateen needs to be corrected to Aiman.
